# Supplementary material for: Intensive care–treated cardiac arrest: A retrospective study on the impact of extended age on mortality, neurological outcome, received treatments and healthcare-associated costs
Source: Research Square preprint supplement (doi:10.21203/rs.3.rs-314595/v1), 2021-03-18
Supplement: Supplementary file 1 [file e0a3d15a6452c3d44c0376db.docx]

**Additional file 2.** Table of TISS-point distribution for individual procedures (OHCA-cases only)

| Procedure, no (%) | Age <75 (n=691) | Age ≥75 (n=92) | *p* |
| --- | --- | --- | --- |
| Tracheostomy care | 20 (3) | 0 (0) | 0.098 |
| Controlled ventilation with or without PEEP combined with IMV or assisted ventilation | 688 (100) | 89 (97) | 0.003 |
| Cardiac arrest or countershock within 48 h | 632 (92) | 75 (82) | 0.002 |
| Controlled ventilation with intermittent or continuous muscle relaxants | 421 (61) | 34 (37) | <0.001 |
| Pulmonary artery catheter | 5 (1) | 0 (0) | 0.413 |
| Pacemaker on standby | 21 (3) | 7 (8) | 0.027 |
| Hemofiltration/dialytic techniques | 23 (3) | 0 (0) | 0.076 |
| Induced hypothermia | 429 (62) | 32 (35) | <0.001 |
| Intra-aortic balloon pressure | 13 (2) | 2 (2) | 0.847 |
| Emergency endoscopy or bronchoscopy | 133 (19) | 13 (14) | 0.236 |
| Vasoactive drug infusion (> 1 drug) | 316 (46) | 38 (41) | 0.423 |
| Intravenous alimentation | 166 (24) | 14 (15) | 0.059 |
| Frequent infusions of blood products (>5 U/24h) | 15 (2) | 1 (1) | 0.490 |
| Vasoactive drug infusion (1 drug) | 579 (84) | 77 (84) | 0.981 |
| Continuous antiarrhythmic infusions | 100 (15) | 11 (12) | 0.516 |
| Cardioversion for arrhythmia | 43 (6) | 5 (5) | 0.767 |
| Arterial line | 690 (100) | 91 (99) | 0.093 |
| Measurement of cardiac output by any method | 249 (36) | 19 (21) | 0.003 |
| Active diuresis for fluid overload or cerebral edema | 418 (61) | 68 (74) | 0.013 |
| Active Rx for metabolic acidosis | 48 (7) | 7 (8) | 0.815 |
| Active anticoagulation (initial 48h) | 599 (87) | 70 (76) | 0.007 |
| Rx of seizures | 96 (14) | 10 (11) | 0.426 |
| Central venous pressure | 528 (76) | 52 (57) | <0.001 |
| Hemodialysis in unstable patient | 1 (0) | 0 (0) | 0.715 |
| Gastrointestinal feedings | 204 (30) | 26 (28) | 0.803 |
| ECG monitoring | 691 (100) | 92 (100) | - |
| Hourly vital signs | 691 (100) | 92 (100) | - |
| Chronic anticoagulation | 453 (66) | 50 (54) | 0.035 |
| Gastrointestinal decompression | 657 (95) | 85 (92) | 0.277 |
| PEEP = Positive end-expiratory pressure, IMV = Intermittent mandatory ventilation, ECG = electrocardiogram | | | |
